# Supplementary material for: Serum biomarkers provide prognostic information in pancreatic ductal adenocarcinoma
Source: Research Square preprint supplement (doi:10.21203/rs.3.rs-7303984/v1), 2025-09-25
Supplement: Supplementary file 1 [file 92b6cbda7424fd44208c4683.docx]

**Prognostic Significance of Serum Markers in Pancreatic Ductal Adenocarcinoma: A Swiss Single-Center Experience**

A. Sgries1, M. Knufinke2, R. Rosenberg3, M. Voegeli4, A. Angelini5, S. Mitrovic6, E. Burri7, K. Mertz8, R. Mosimann9, M. Vetter*4, E.D. Chiru*4

1. Medical University Hamburg, Hamburg, Germany
2. Department of Health and Science Technology, ETH Zürich, Switzerland
3. Clinic for Surgery and Visceral Surgery, Colon Cancer Center, Cantonal Hospital Baselland, Liestal, Switzerland
4. Cancer Center Baselland, Medical University Clinic, Liestal, Switzerland
5. University Center for Internal Medicine, Cantonal Hospital Baselland, Liestal, Switzerland
6. Central Laboratory, Cantonal Hospital Baselland, Liestal, Switzerland
7. University Center for Gastroenetrology and Hepatology, Cantonal Hospital Baselland, Liestal, Switzerland
8. Institute for Pathology, Cantonal Hospital Baselland, Liestal, Switzerland
9. Medical University, Basel University, Basel, Switzerland

* Shared Last Authorship

**Supplementary Material**

**I**
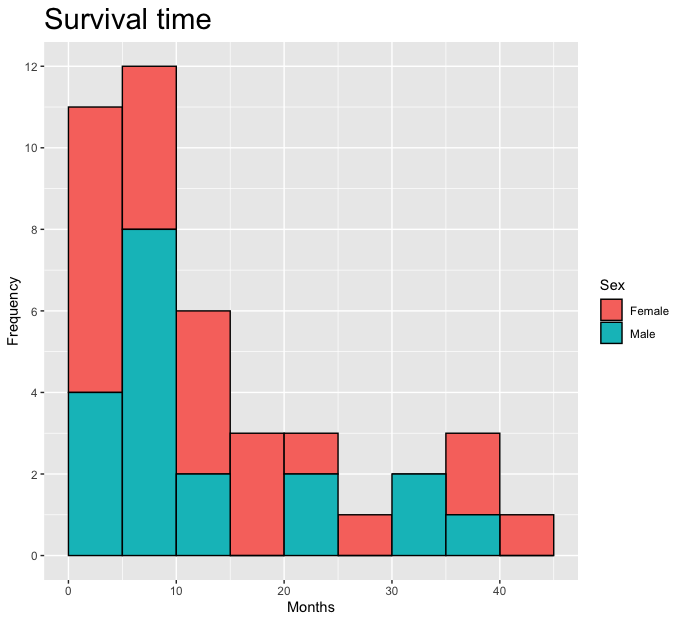
.

**IIi**.


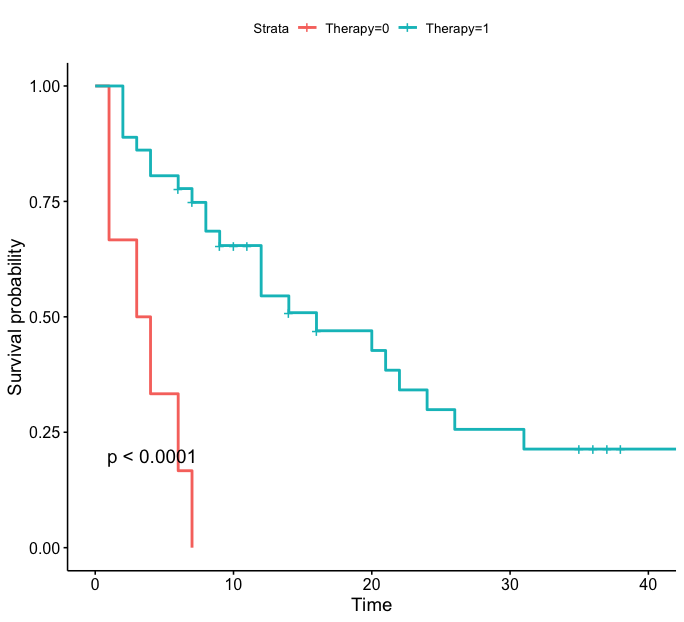

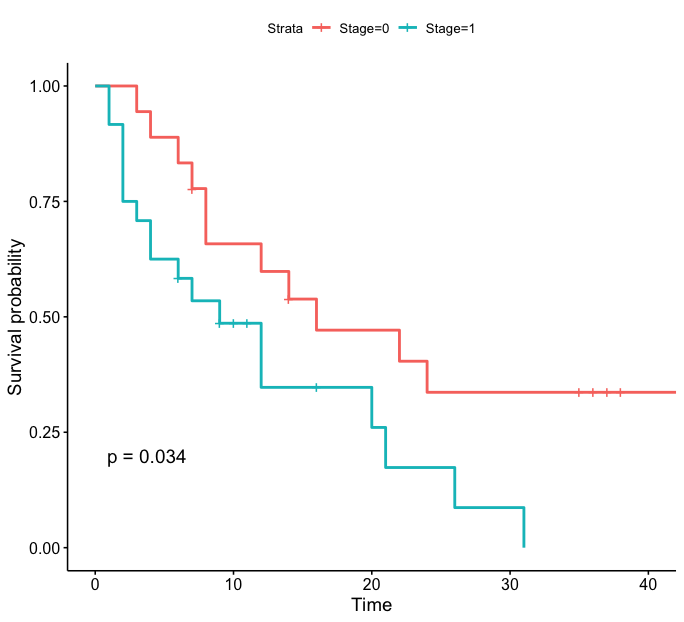


*Fig. 3A survival analysis showing improved survival with receipt of therapy (I) and localized disease (II); No therapy = 0, Receipt of therapy = 1; Stage 0 = localized disease, Stage 1 = metastatic disease.*

**I**
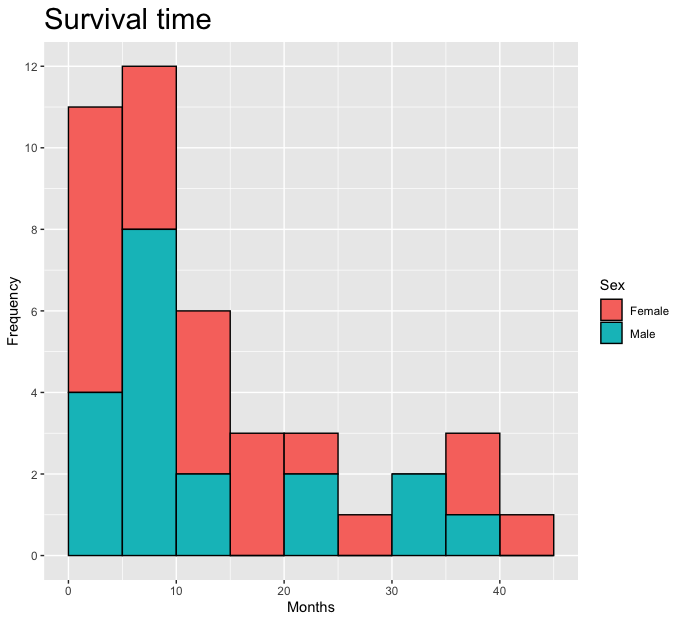
.

**IIi**.


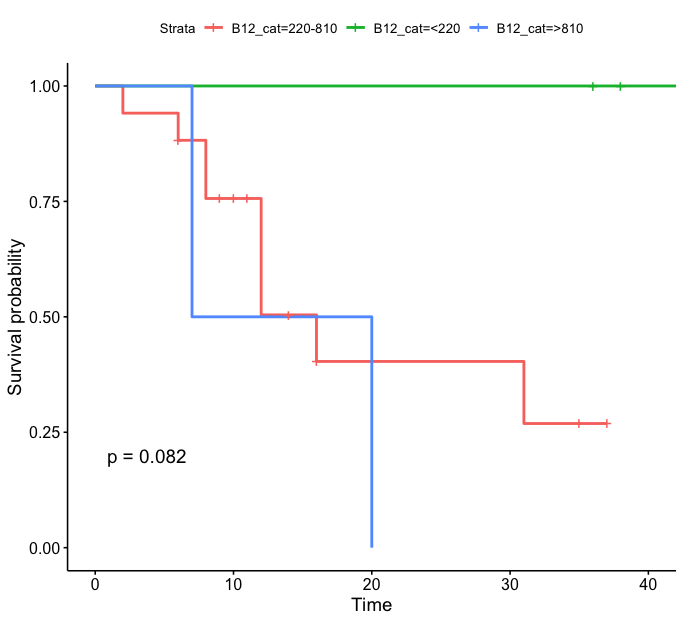

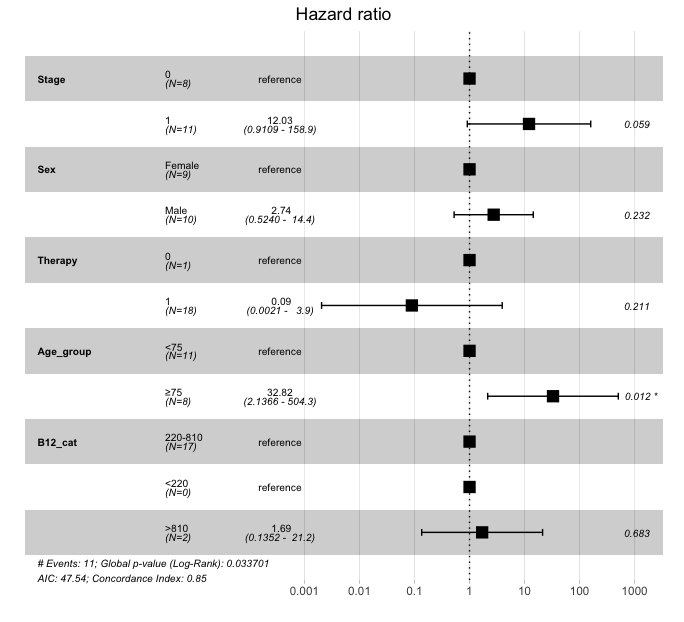


*Fig. 3A Mutlivariate Cox regression analysis showing no impact of vitamin B12, grouped in category values (<220 pmol/L, 220-810 pmol/L, >810 pmol/L) on risk of death (I) and survival analysis showing no impact of vitamin B12 on the survival curve (II)*


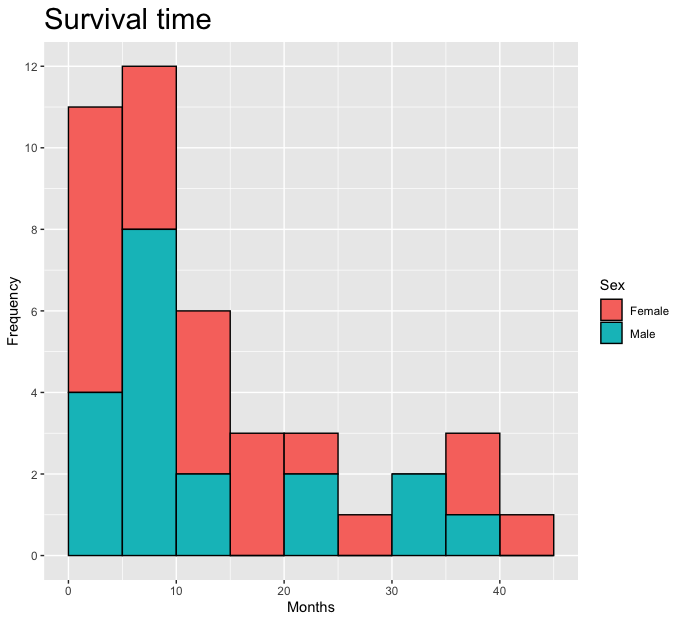


***Figure 4 B. Survival distribution according to gender***

**Table 3. Multivariate Regression Analysis showing impact of age and laboratory biomarkers on survival, in patients >75 and <75 years, on censored and uncensored survival data.** SD = standard deviation, CI = confidence interval, CRP = C-reactive Protein, LDH = lactate dehydrogenase, NLR = neutrophiles to lymphocytes ratio.

| **Regression Analysis in Patients > 75 years uncensored** | | | |
| --- | --- | --- | --- |
|  | **P-value** | **SD** | **CI** |
| **Age>75** | 0.233 | 0.76 | -2.97, 0.92 |
| **Albumin** | 0.154 | 0.55 | -2.32, 0.49 |
| **CRP** | 0.529 | -0.22 | -0.22, 0.02 |
| **LDH** | 0.831 | -0.02 | -0.02, 0.02 |
| **NLR** | 0.76 | -1.77 | -1.77, 1.38 |
| **Regression Analysis in Patients > 75 years censored** | | | |
| **Age>75** | 0.612 | 1.85 | -5.48, 4.37 |
| **Albumin** | 0.908 | 1.42 | -2.94, 4.63 |
| **CRP** | 0.755 | 0.16 | -0.38, 0.47 |
| **LDH** | 0.148 | 0.02 | -0.06, 0.06 |
| **NLR** | 0.613 | 1.28 | -4.91, 1.92 |
| **Regression Analysis in Patients < 75 years uncensored** | | | |
| **Age < 75** | 0.667 | 0.55 | -1.48, 0.99 |
| **Albumin** | 0.903 | 0.79 | -1.87, 1,67 |
| **CRP** | 0.308 | 0.47 | -0.55, 1.17 |
| **LDH** | 0.377 | 0.1 | -0.12, 0.3 |
| **NLR** | 0.382 | 2.09 | -6.57, 2.74 |
| **Regression Analysis in Patients < 75 years censored** | | | |
| **Age < 75** | 0.856 | 0.46 | -1.06, 0.89 |
| **Albumin** | 0.047 | 0.63 | 0.02, 2.68 |
| **CRP** | 0.077 | 0.33 | -1.33, 0.07 |
| **LDH** | 0.671 | 0.07 | -0.12, 0.19 |
| **NLR** | 0.097 | 0.39 | -1.48, 0.14 |
